# Supplementary material for: Genome concentration, characterization, and integrity analysis of recombinant adeno-associated viral vectors using droplet digital PCR
Source: PubMed Central journal article supplement (PMC9876284; doi:10.1371/journal.pone.0280242), 2023-01-25
Supplement: pone.0280242.s001.pdf [file pone.0280242.s001.pdf]

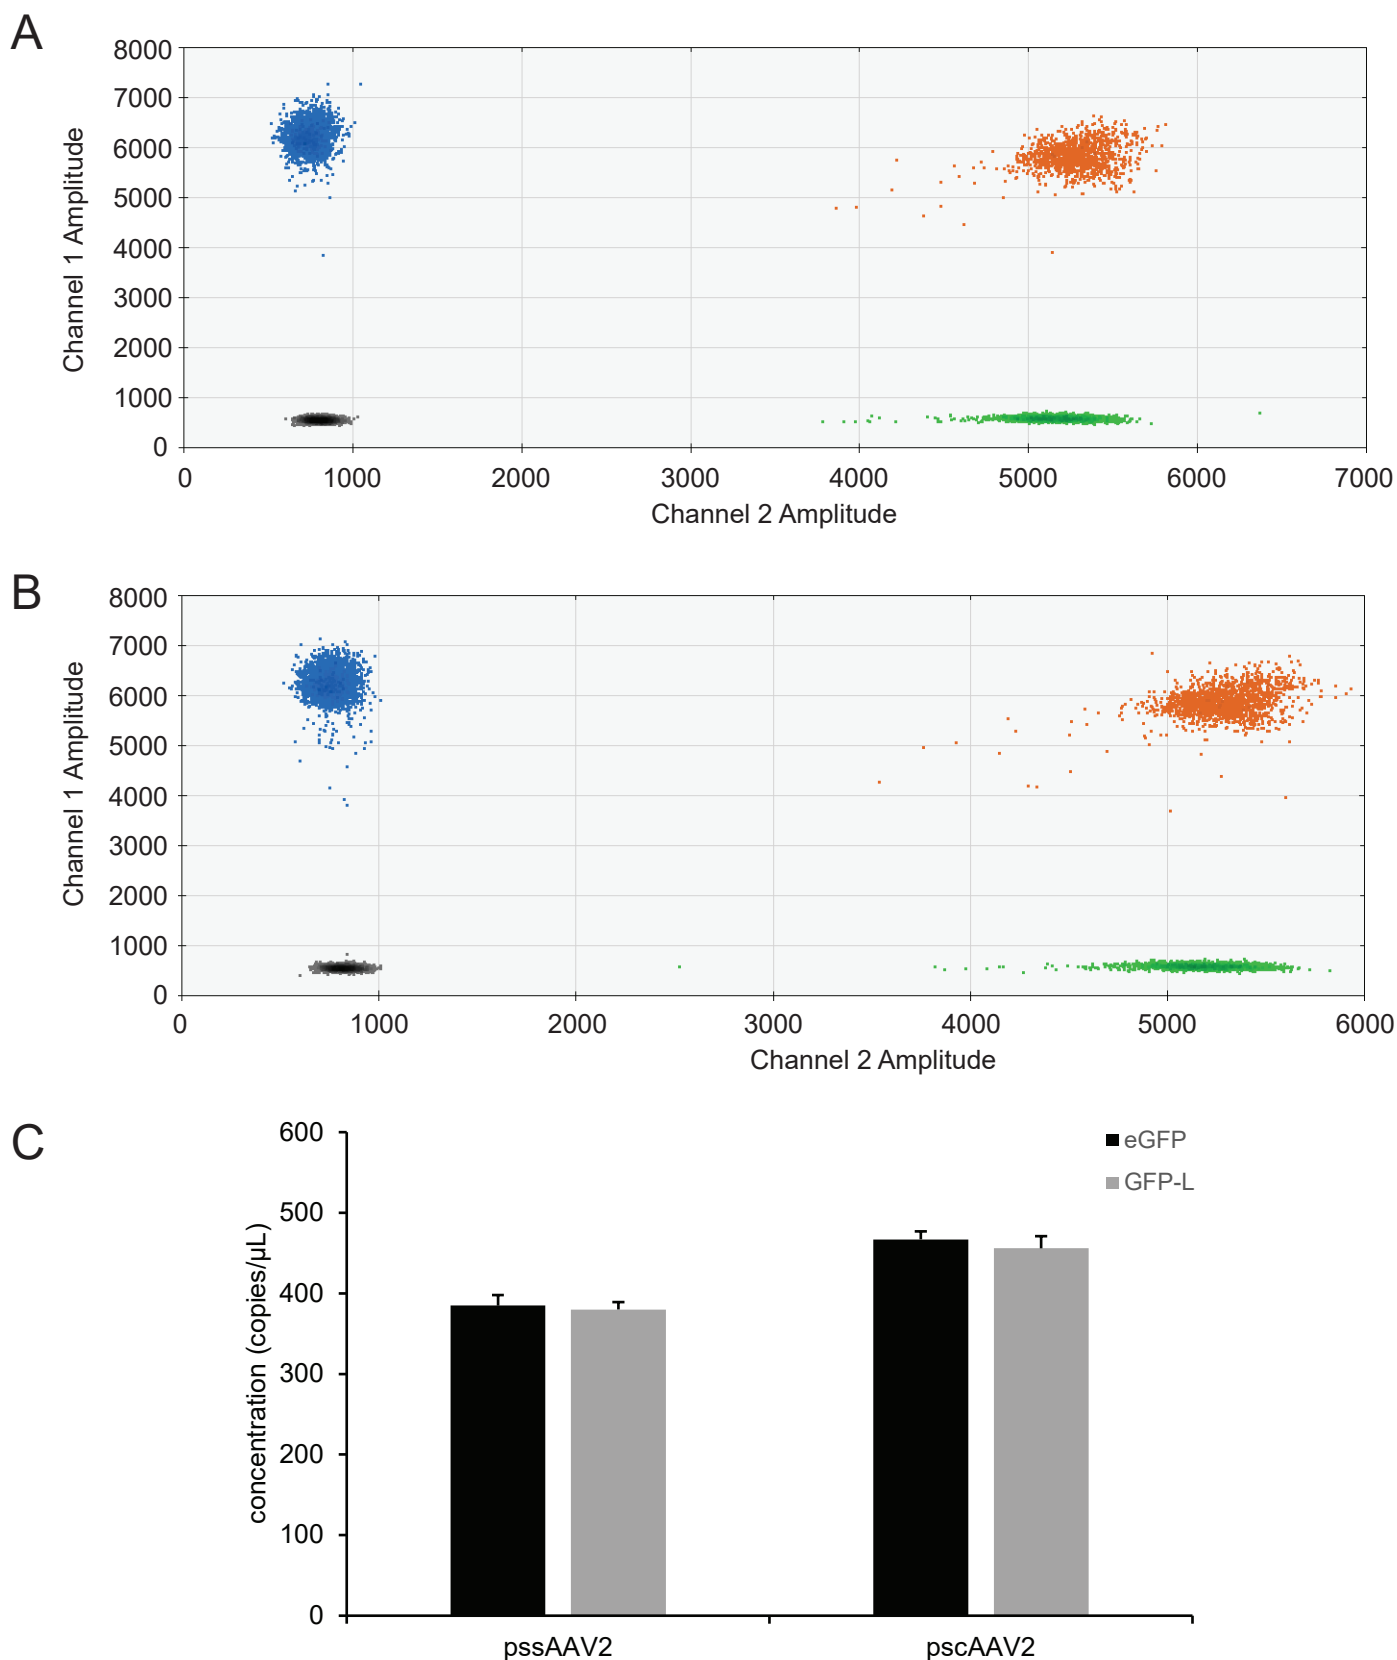

**S1 Fig. Comparison of two GFP ddPCR assays.** Two-dimensional fluorescence plots of eGFP FAM in Channel 1 and GFP-L HEX in Channel 2 are shown for reactions containing 5 U HaeIII and (A) a single-stranded genome vector plasmid, pssAAV2, or (B) a self-complementary genome vector plasmid, pscAAV2, as a template. Both plasmids were diluted with polyA buffer. Droplets that contained eGFP are in blue, GFP-L are in green, and neither sequence in gray. Droplets that contained both the sequences are in orange. (C) Concentration of eGFP (black bars) and GFP-L (gray bars) in pssAAV2 and pscAAV2 samples. For each plasmid, a t-test determined that the mean concentrations for the eGFP and GFP-L assays are not statistically different from each other. The concentration of the two plasmids is expected to be different. The eGFP/GFP-L concentration ratio is  $1.01 \pm 0.03$  for pssAAV2 and  $1.02 \pm 0.03$  for pscAAV2. Error bars represent the 95% confidence interval.
