# Supplementary material for: Genome concentration, characterization, and integrity analysis of recombinant adeno-associated viral vectors using droplet digital PCR
Source: PubMed Central journal article supplement (PMC9876284; doi:10.1371/journal.pone.0280242), 2023-01-25
Supplement: pone.0280242.s006.pdf [file pone.0280242.s006.pdf]

# PLASMIDS

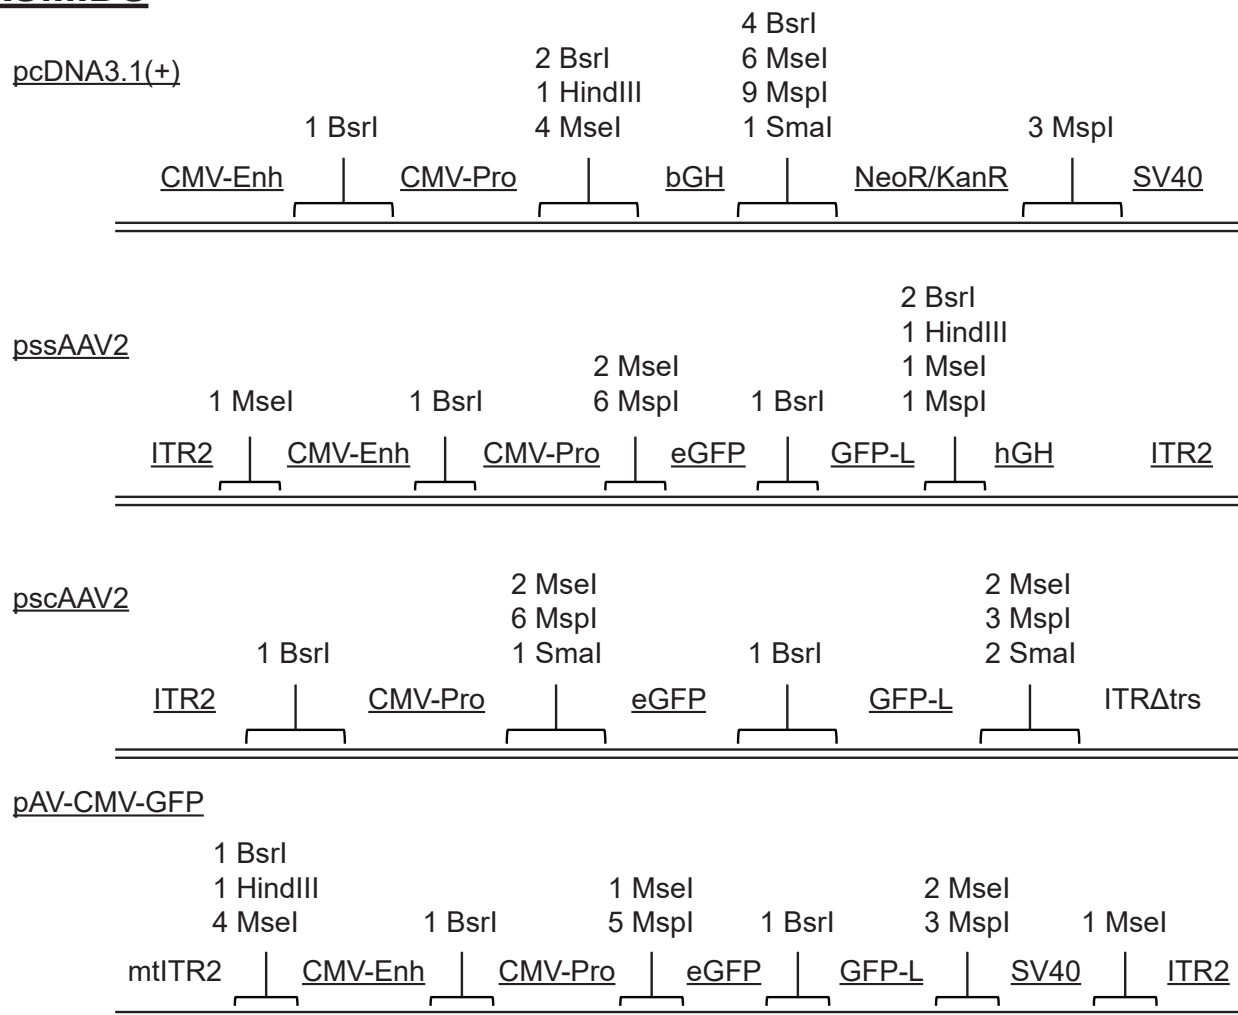

## AAV vectors

single-stranded from pAV-CMV-GFP

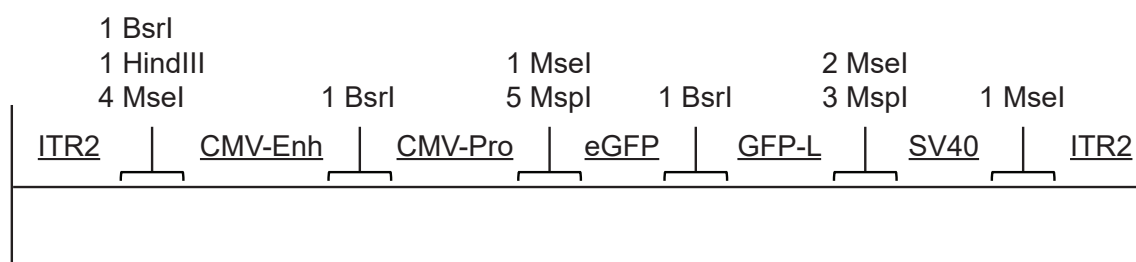

double-stranded from pscAAV2

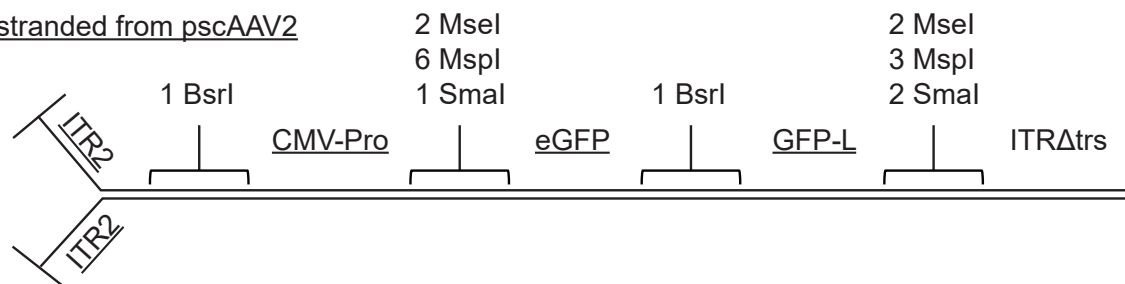

**S6 Fig. Schematic of restriction sites.** Summary of restriction sites for enzymes mentioned in the manuscript for assays (underlined text) or DNA elements (mtITR2 and ITR $\Delta$ trs) that do not amplify with any assay. The AAV vector diagrams show the restriction sites based on the indicated vector genome plasmid. ITR $\Delta$ trs is the mutated ITR for generating self-complementary vectors and mtITR2 is the non-canonical ITR2 resulting from mutations within an ITR2 assay primer binding site.
