# Supplementary material for: Genome concentration, characterization, and integrity analysis of recombinant adeno-associated viral vectors using droplet digital PCR
Source: PubMed Central journal article supplement (PMC9876284; doi:10.1371/journal.pone.0280242), 2023-01-25
Supplement: pone.0280242.s010.pdf [file pone.0280242.s010.pdf]

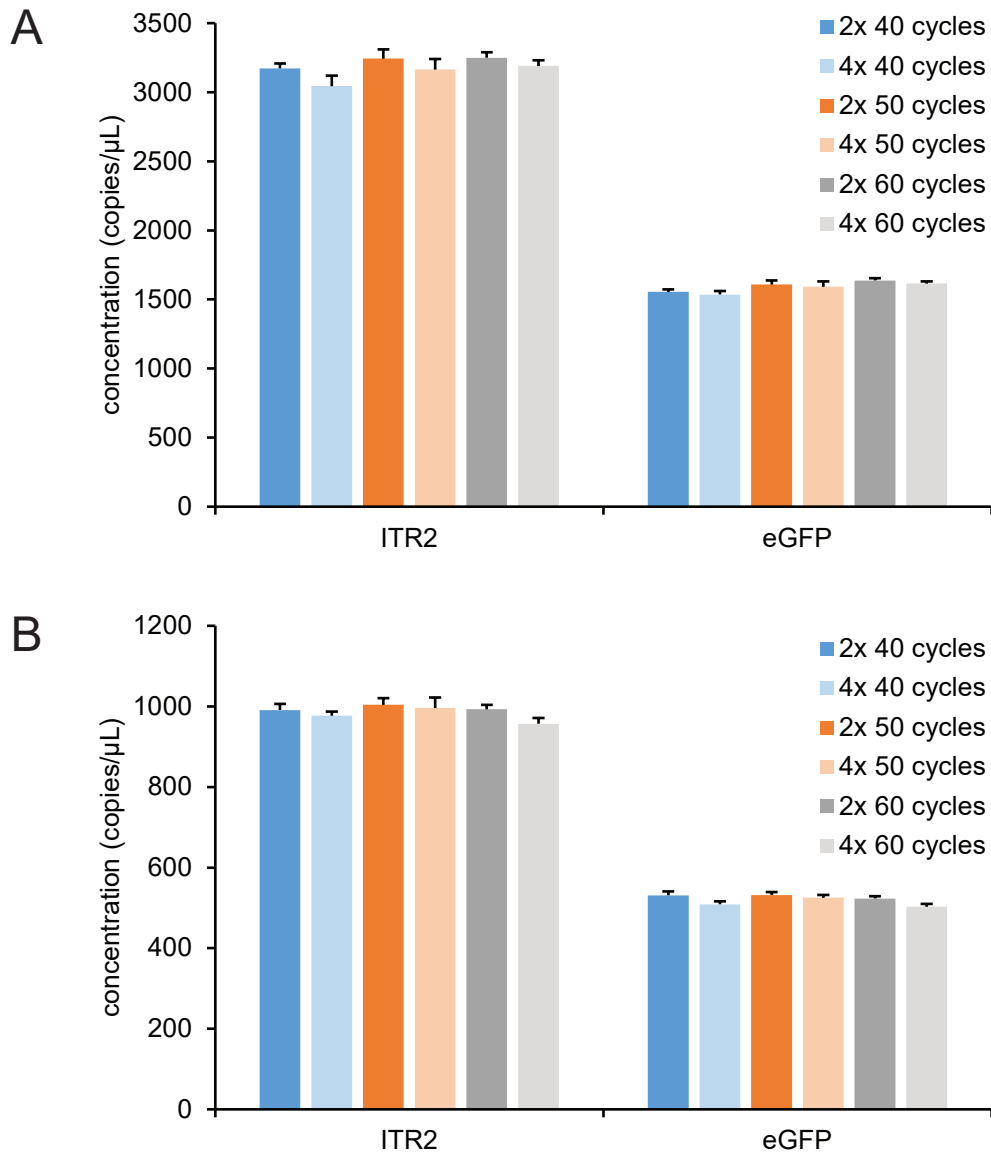

**S10 Fig. Comparison of supermix and thermal cycle number on assay concentration.** (A) pssAAV2 or (B) an AAV2 vector were thermal cycled for 40, 50, or 60 cycles in either ddPCR Supermix for Probes, No dUTP (2x) or ddPCR Multiplex Supermix (4x). DNase I-digested AAV2 was serially diluted using polyA+ buffer into the ddPCR concentration range and thermally lysed at 95°C for 10 min prior to assembling ddPCR reactions. The error bars represent the 95% confidence interval.
