# Supplementary material for: Genome concentration, characterization, and integrity analysis of recombinant adeno-associated viral vectors using droplet digital PCR
Source: PubMed Central journal article supplement (PMC9876284; doi:10.1371/journal.pone.0280242), 2023-01-25
Supplement: pone.0280242.s020.pdf [file pone.0280242.s020.pdf]

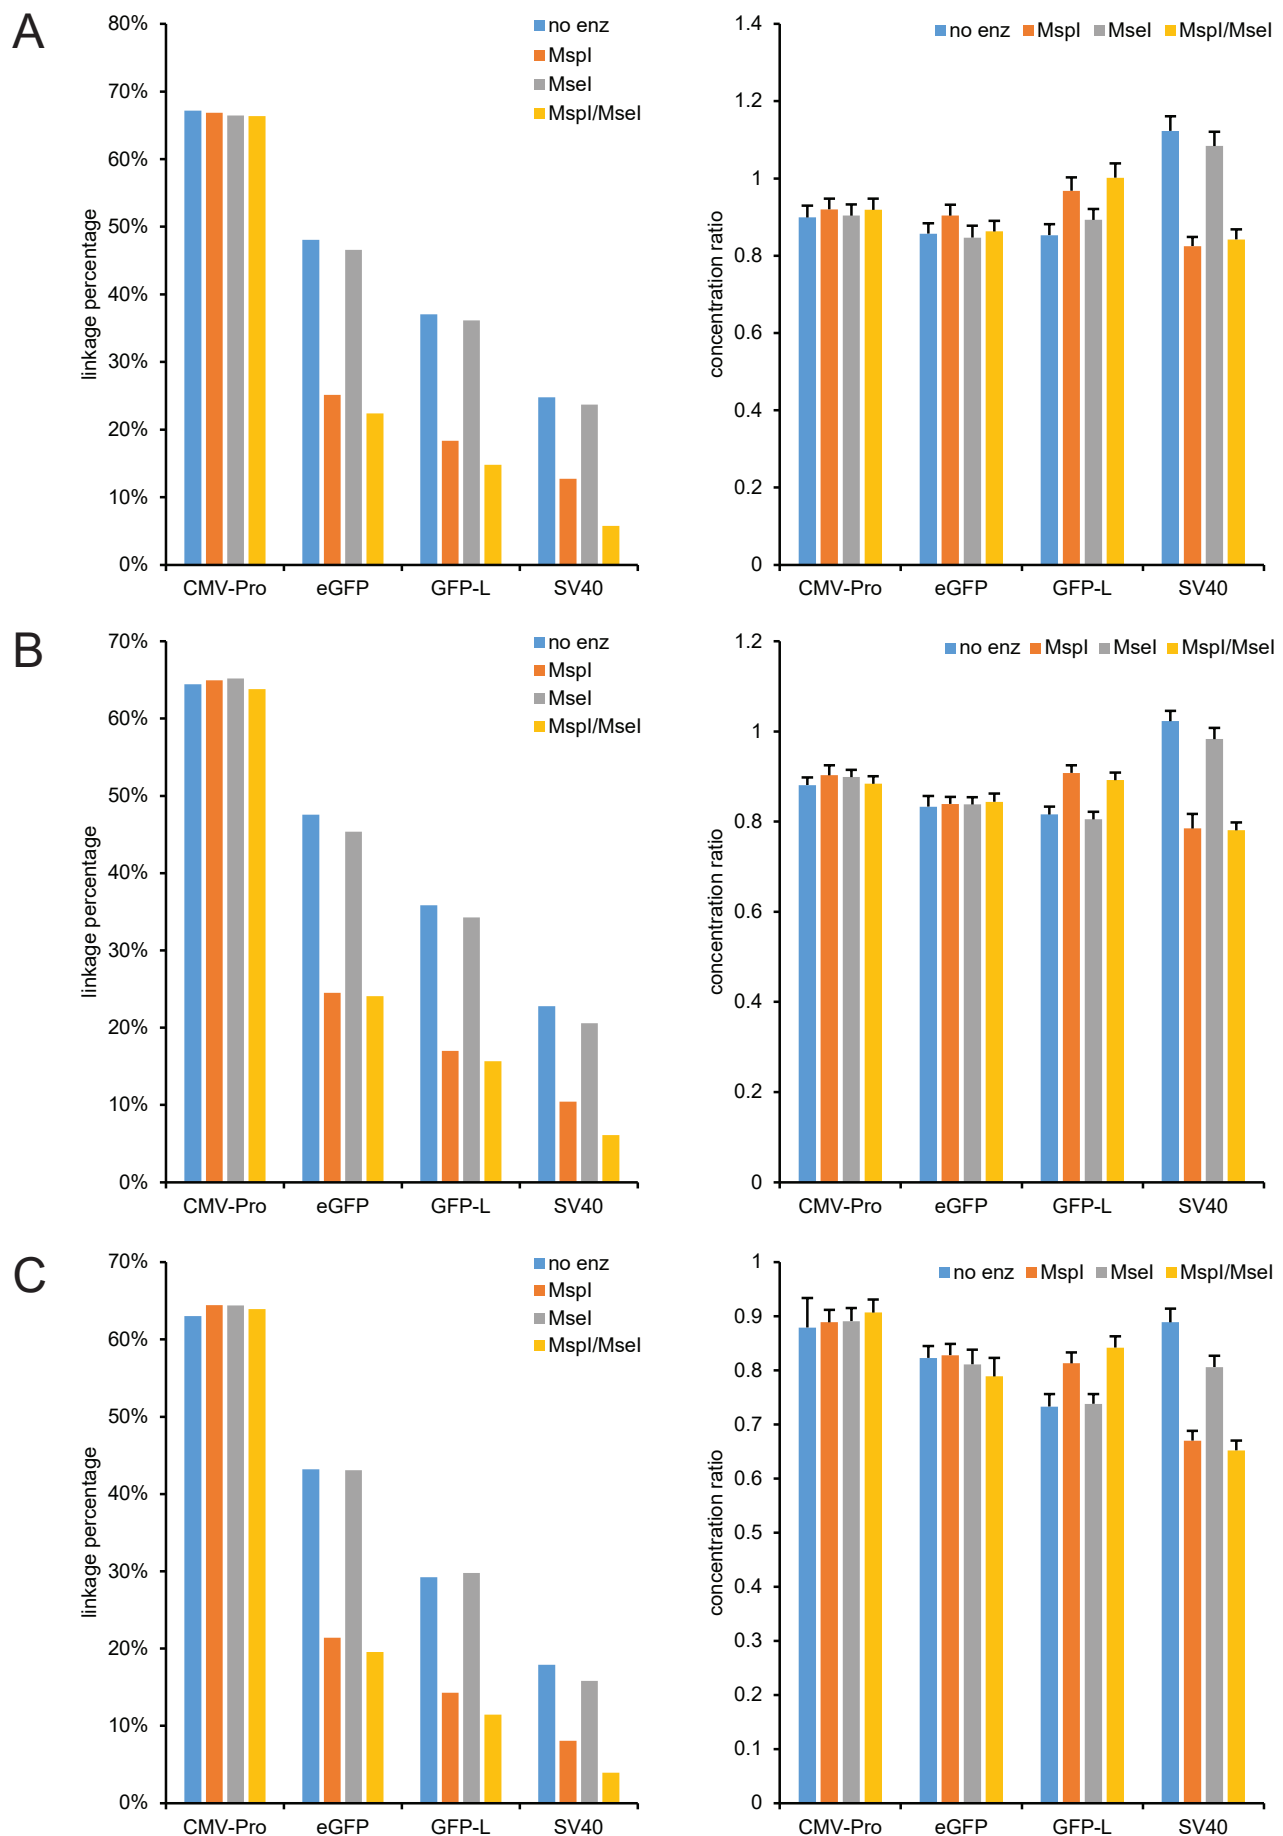

**S20 Fig. Milepost experiment using AAV1, AAV5, and AAV8.** Viral samples were DNase I treated and lysed for 10 min at 95°C prior to droplet formation (pre-droplet lysis) and then used as a template for duplex ddPCR reactions using CMV-Enh FAM and the indicated HEX assay with either no enzyme, MspI, MseI, or a double digest with MspI and MseI. The calculated linkage percentage (left plot)<sup>17</sup> and concentration ratio of CMV-Enh FAM to the HEX assay with the corresponding 95% confidence interval (right plot) is shown for (A) AAV1, (B) AAV5, and (C) AAV8. The error bars represent the 95% confidence interval.
