# Supplementary material for: Genome concentration, characterization, and integrity analysis of recombinant adeno-associated viral vectors using droplet digital PCR
Source: PubMed Central journal article supplement (PMC9876284; doi:10.1371/journal.pone.0280242), 2023-01-25
Supplement: pone.0280242.s023.pdf [file pone.0280242.s023.pdf]

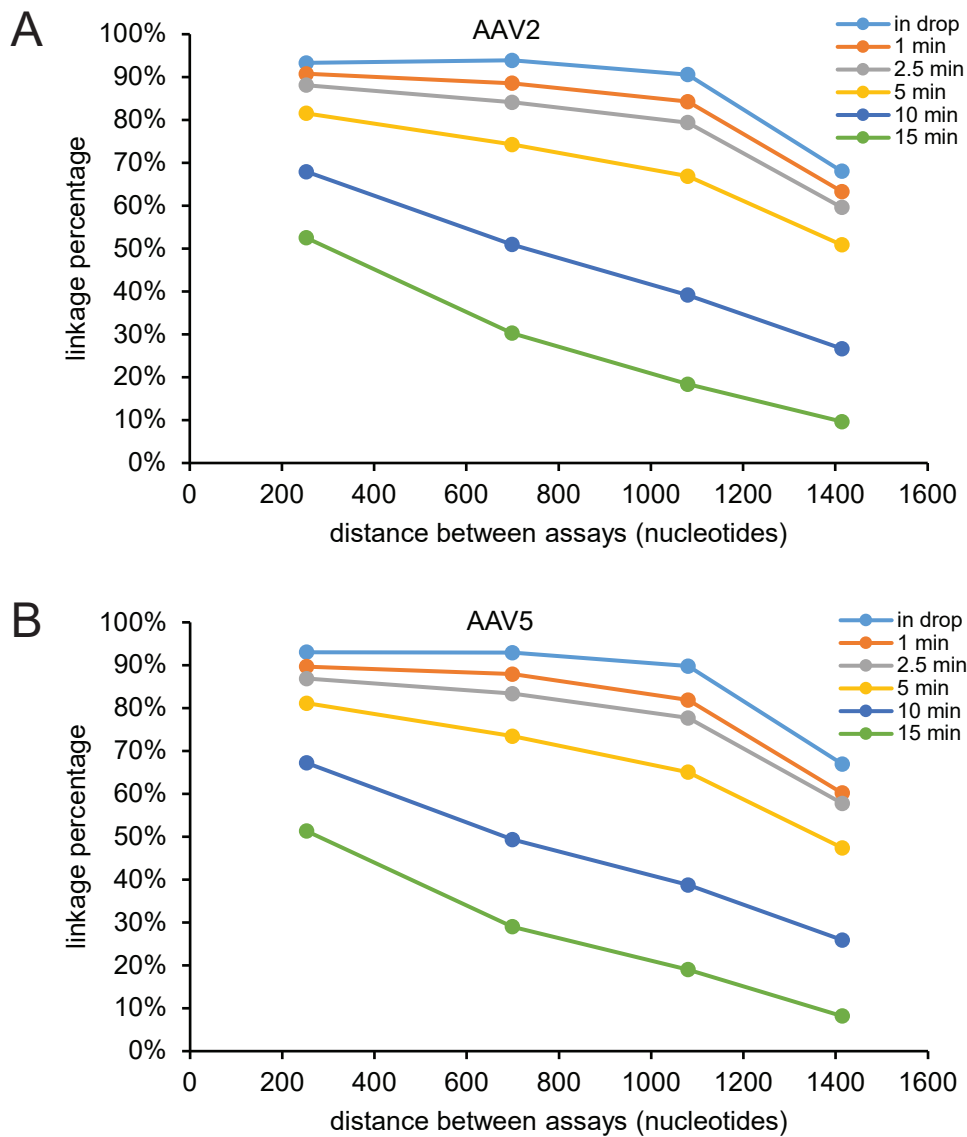

**S22 Fig. Linkage percentage as a function of assay separation.** (A) AAV2 and (B) AAV5 viral samples were used either directly as a template (in drop) or after the indicated incubation time (1, 2.5, 5, 10, or 15 minutes) at 95°C for duplex ddPCR reactions using CMV-Enh FAM and the indicated HEX assay. The linkage percentage was calculated using a previously published equation.<sup>17</sup>
