# Supplementary material for: Genome concentration, characterization, and integrity analysis of recombinant adeno-associated viral vectors using droplet digital PCR
Source: PubMed Central journal article supplement (PMC9876284; doi:10.1371/journal.pone.0280242), 2023-01-25
Supplement: pone.0280242.s024.pdf [file pone.0280242.s024.pdf]

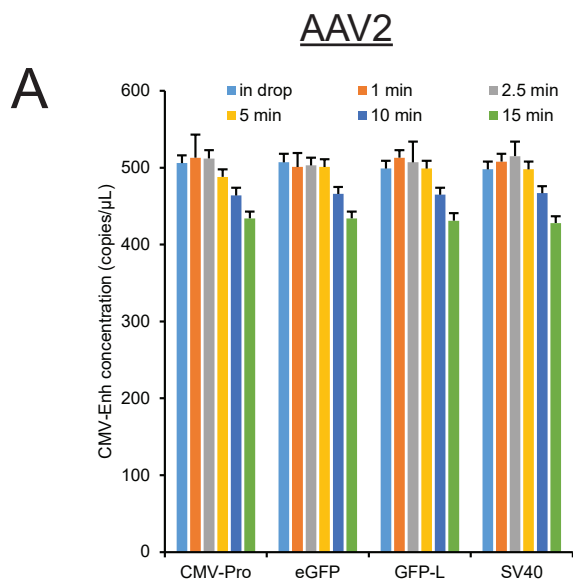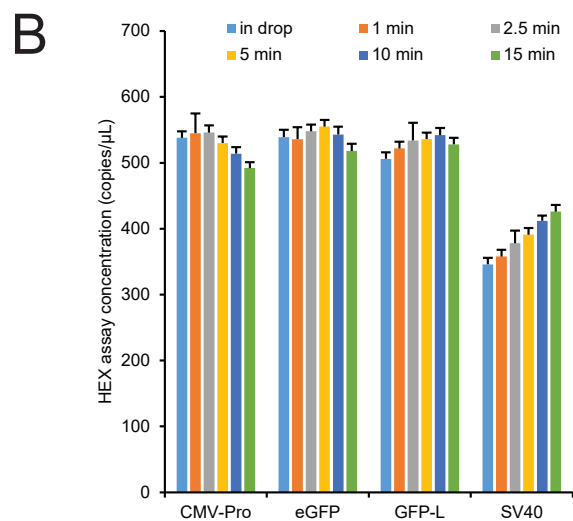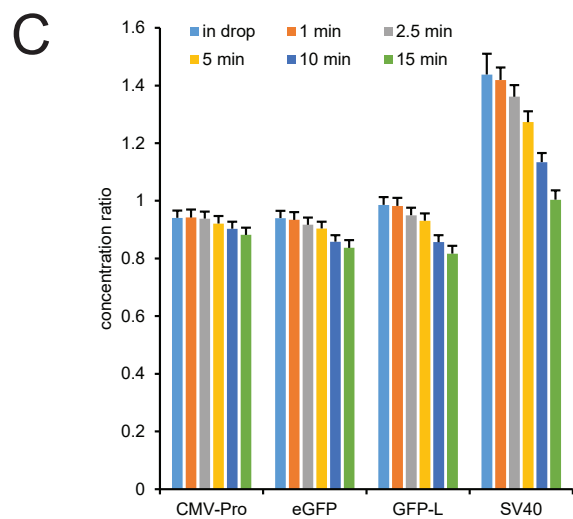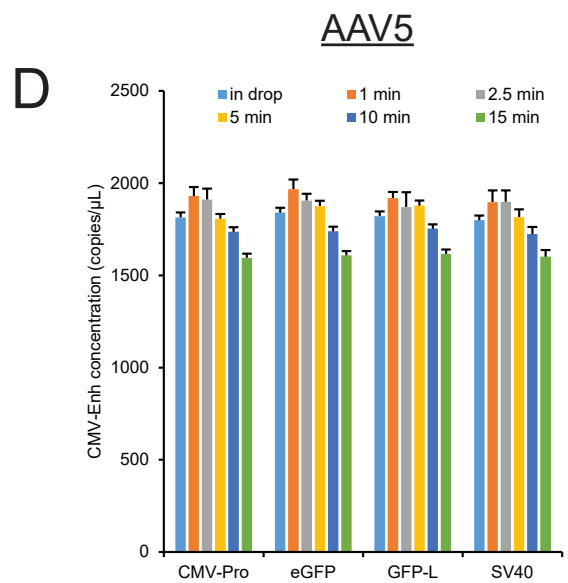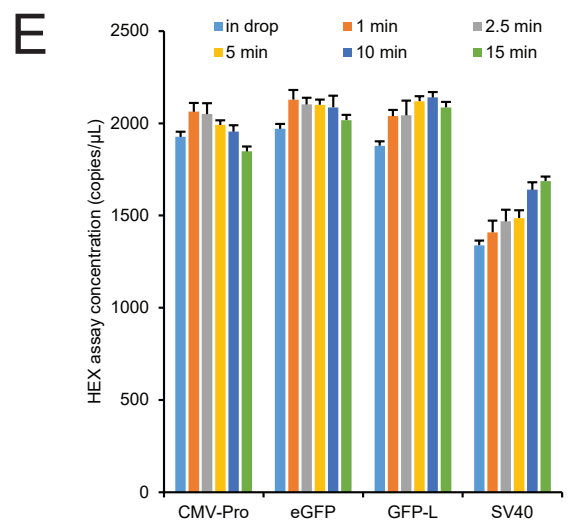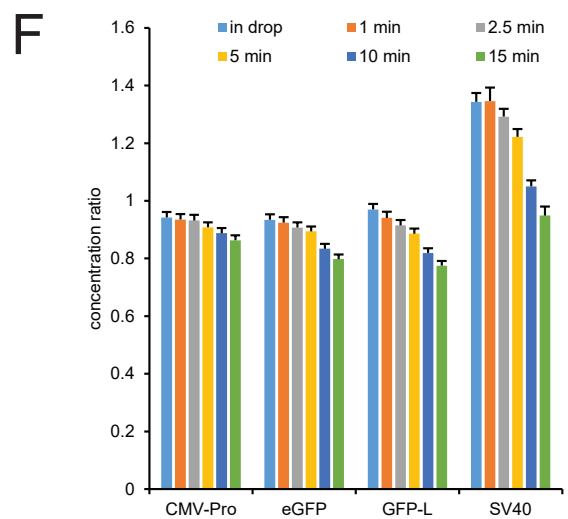

**S24 Fig. Milepost experiment using AAV2 and AAV5 with different capsid lysis times.** AAV2 (A, B, and C) and AAV5 (D, E, and F) viral samples were used either directly as a template (in drop) or after the indicated incubation time (1, 2.5, 5, 10, or 15 minutes) at 95°C for duplex ddPCR reactions using CMV-Enh FAM and the indicated HEX assay. The CMV-Enh concentration (A and D), HEX assay concentration (B and E) or the CMV-Enh to HEX assay concentration ratio (C and F) is shown with the 95% confidence interval.
