# Supplementary material for: Genome concentration, characterization, and integrity analysis of recombinant adeno-associated viral vectors using droplet digital PCR
Source: PubMed Central journal article supplement (PMC9876284; doi:10.1371/journal.pone.0280242), 2023-01-25
Supplement: pone.0280242.s027.pdf [file pone.0280242.s027.pdf]

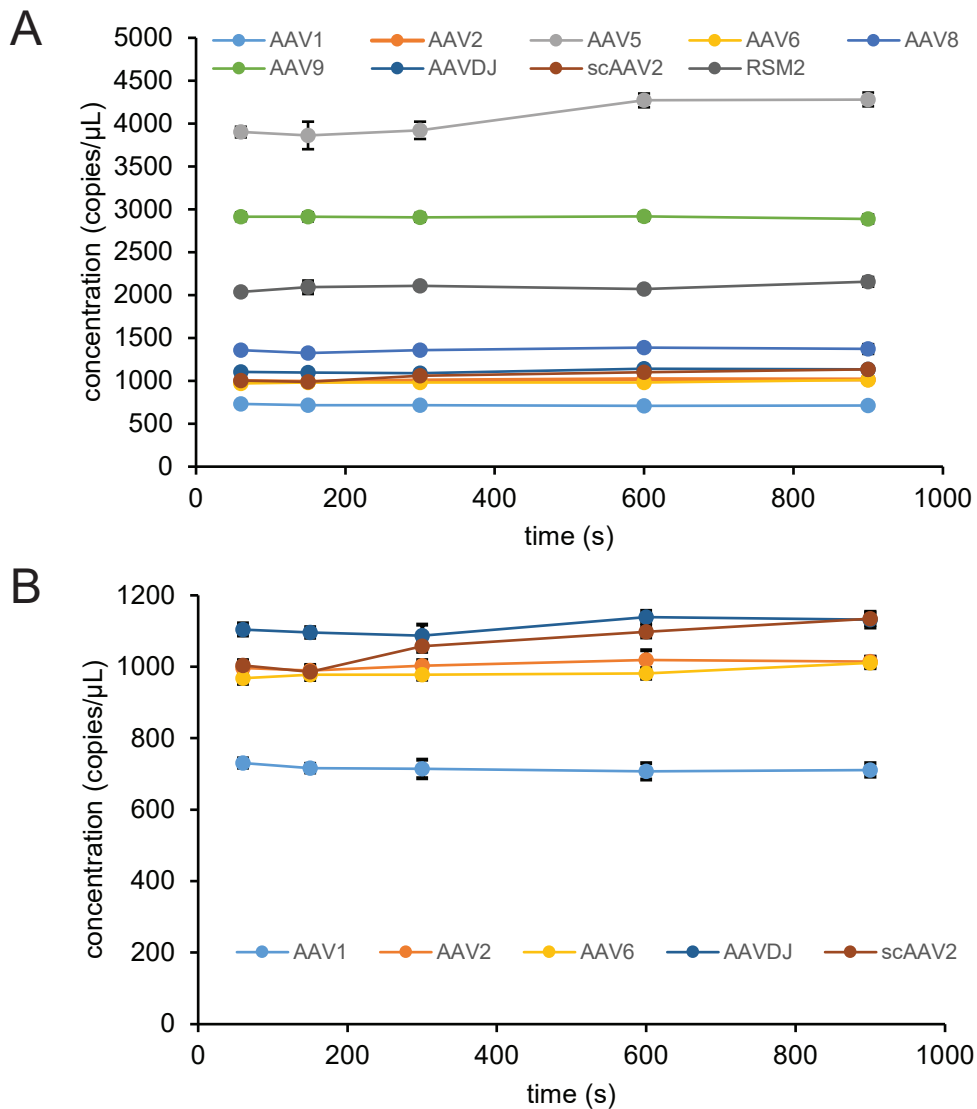

**S27 Fig. ITR2 concentration as a function of capsid lysis time.** Viruses were lysed for 1, 2.5, 5, 10, or 15 minutes at 95°C and then used as a template for a singleplex ITR assay. (A) Concentration data for all vectors or (B) concentrations below 1200 copies/μL are shown with the 95% confidence interval. The 95% confidence interval is smaller than the symbols when not visible. All viruses were single-stranded except for a self-complementary AAV2 (scAAV2).
