# Supplementary material for: Genome concentration, characterization, and integrity analysis of recombinant adeno-associated viral vectors using droplet digital PCR
Source: PubMed Central journal article supplement (PMC9876284; doi:10.1371/journal.pone.0280242), 2023-01-25
Supplement: pone.0280242.s029.pdf [file pone.0280242.s029.pdf]

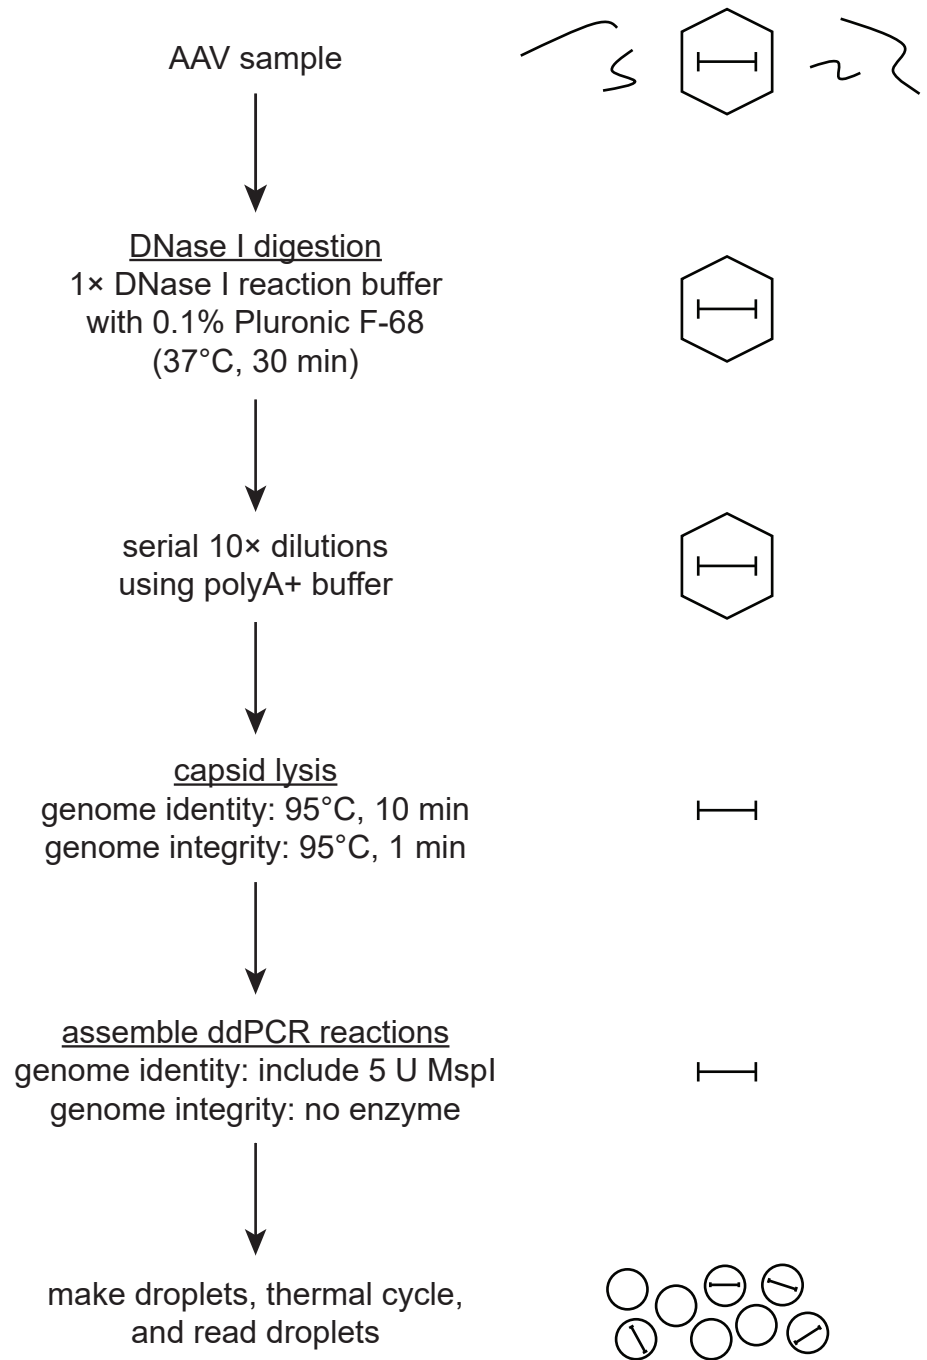

**S29 Fig. AAV workflow schematic.** Summary of the AAV workflow for genome identity (concentration) or genome integrity experiments.
